# Supplementary material for: Ring size effect on the solid state assembly of propargyl substituted hexa- and octacyclic peptoids
Source: Royal Society of Chemistry journal article supplement (doi:10.1039/c6ce01800a), 2016-01-01
Supplement: c6ce01800a1.pdf [file c6ce01800a1.pdf]

## SUPPORTING INFORMATION

for

### **RING SIZE EFFECT ON THE SOLID STATE ASSEMBLY AND INCLUSION PROPERTIES OF PROPARGYL SUBSTITUTED HEXA AND OCTA CYCLIC PEPTOIDS**

Consiglia Tedesco,<sup>a,\*</sup> Alessandra Meli,<sup>a</sup> Eleonora Macedi,<sup>a</sup> Veronica Iuliano,<sup>a</sup> Antonio G. Ricciardulli,<sup>a</sup> Francesco De Riccardis,<sup>a</sup> Gavin Vaughan,<sup>b</sup> Vincent J. Smith,<sup>c</sup> Leonard J. Barbour<sup>c</sup> and Irene Izzo<sup>a,\*</sup>

- 
- [a] Dipartimento di Chimica e Biologia "A. Zambelli"  
Università degli Studi di Salerno,  
Via Giovanni Paolo II 132, I-84084 Fisciano (SA), Italy
- [b] ESRF, 8 Rue J. Horowitz, 38043 Grenoble, France
- [c] Department of Chemistry and Polymer Science,  
University of Stellenbosch,  
Private Bag X1, 7602 Matieland, Stellenbosch, South Africa.

\*Corresponding authors: email: ctedesco@unisa.it; iizzo@unisa.it

|                                                                                                                                           |    |
|-------------------------------------------------------------------------------------------------------------------------------------------|----|
| <b>Index</b>                                                                                                                              |    |
| <b>List of Abbreviation</b>                                                                                                               | 2  |
| <br>                                                                                                                                      |    |
| <b>Crystal forms 1A and 1B</b>                                                                                                            |    |
| <br>                                                                                                                                      |    |
| <b>Figure S1.</b> ORTEP and numbering scheme                                                                                              | 3  |
| <b>Figure S2.</b> Superposition of the cyclopeptoid molecules with idealized type III <i>beta</i> -turn peptide                           | 4  |
| <b>Figure S3.</b> Rectangular shape of cyclic peptoid backbone in <b>1B</b>                                                               | 5  |
| <b>Figure S4.</b> Hirshfeld surfaces                                                                                                      | 6  |
| <b>Figure S5.</b> Intralayer interactions                                                                                                 | 7  |
| <b>Figure S6.</b> Void space for guest molecules                                                                                          | 8  |
| <br>                                                                                                                                      |    |
| <b>Crystal forms 2A, 2B, 2C and 2D</b>                                                                                                    |    |
| <br>                                                                                                                                      |    |
| <b>Figure S7.</b> Superposition of the cyclopeptoid molecules in crystal form <b>2A</b> with idealized type III <i>beta</i> -turn peptide | 9  |
| <b>Figure S8.</b> Guest accessible voids in crystal form <b>2A</b>                                                                        | 9  |
| <b>Figure S9.</b> Molecular overlay between crystal forms <b>2A</b> and <b>2B</b> , <b>2A</b> and <b>2C</b> , <b>2A</b> and <b>2D</b>     | 10 |
| <b>Figure S10.</b> Crystal packing                                                                                                        | 11 |

## LIST OF ABBREVIATIONS

**DMSO**      dimethylsulfoxide

*Npa*        *N*-(propargyl)glycine

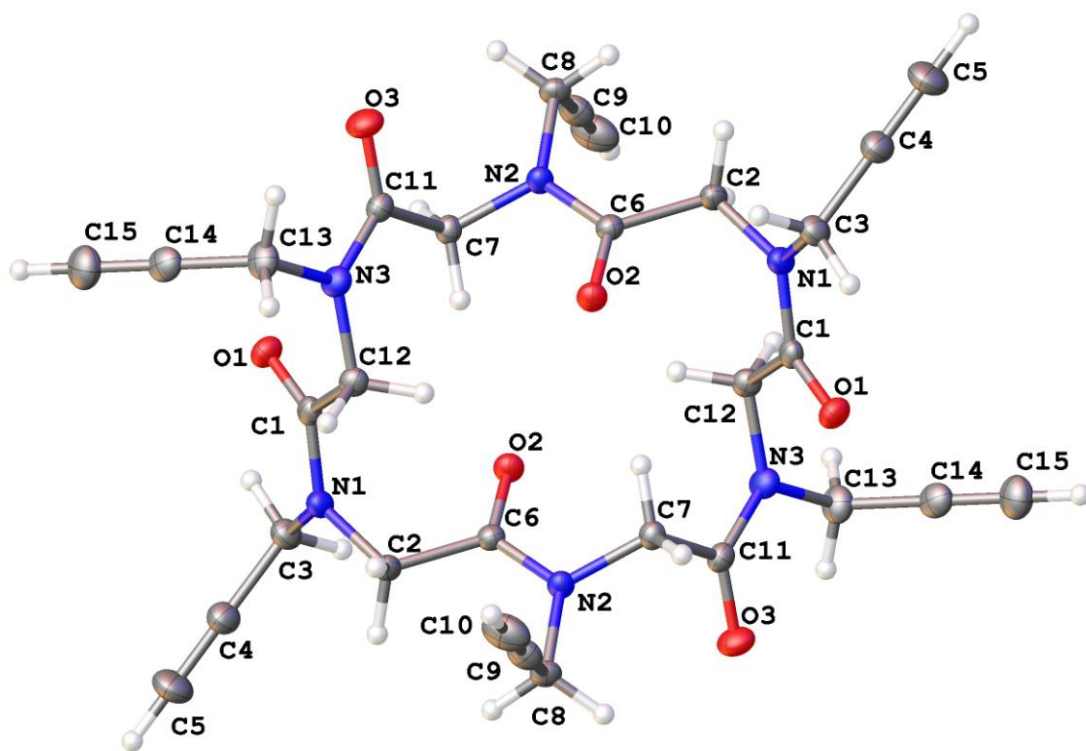

(a)

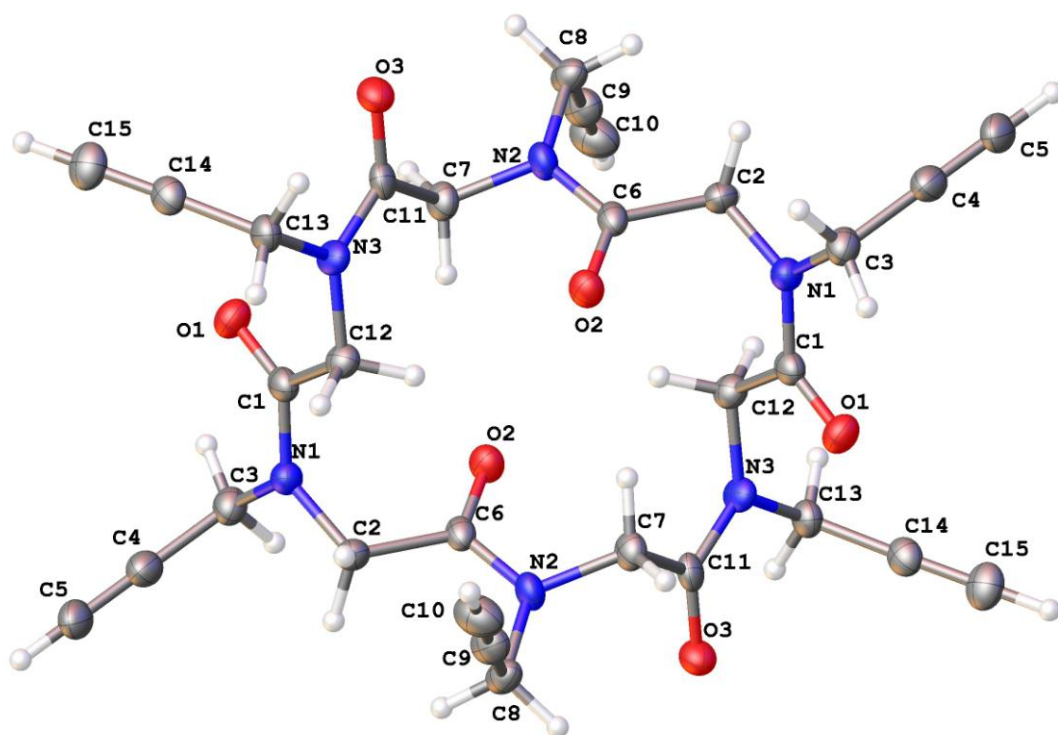

(b)

**Figure S1.** (a) ORTEP with numbering scheme for the cyclopeptoid molecule Cyclo-(*Npa*)<sub>6</sub> **1** (a) in crystal form **1A** and (b) in crystal form **1B**.

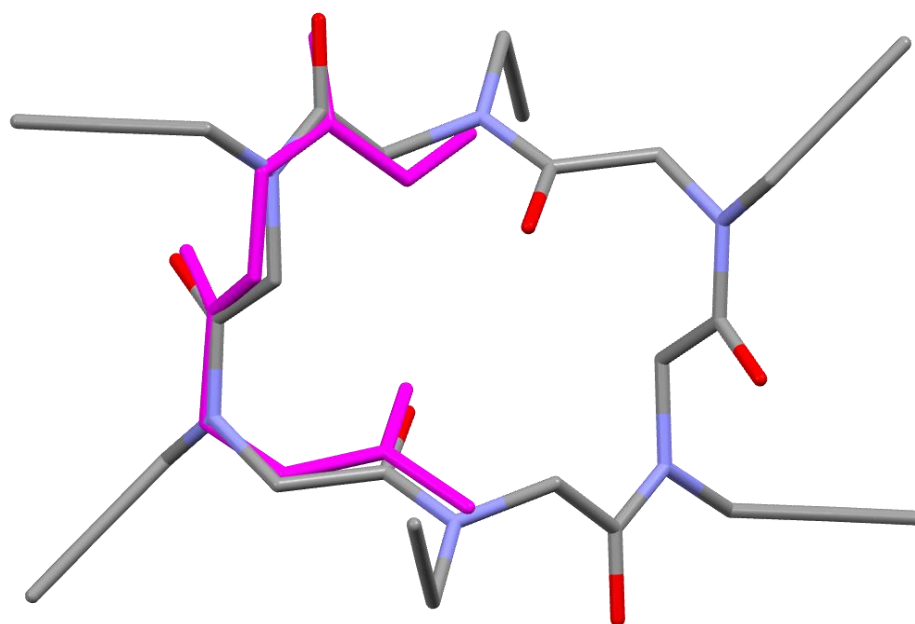

(a)

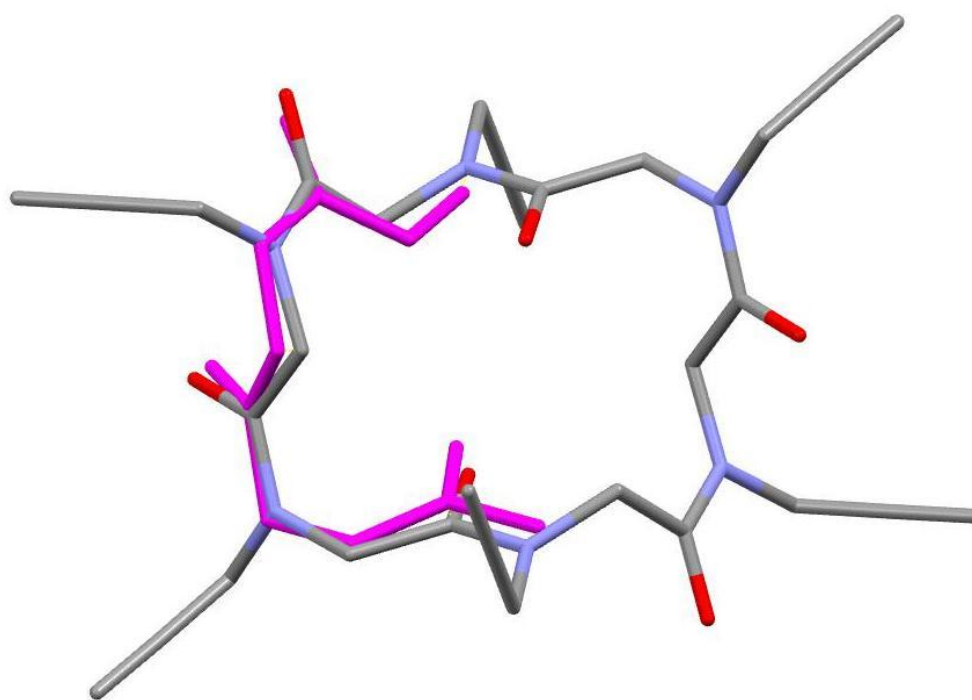

(b)

**Figure S2.** (a) Superposition of the backbone atoms of cyclopeptoid molecules in crystal form **1A** with idealized type III *beta*-turn peptide (magenta), rmsd 0.344 Å; (b) superposition of the backbone atoms of cyclopeptoid molecules in crystal form **1B** with idealized type III *beta*-turn peptide (magenta), rmsd 0.369 Å.

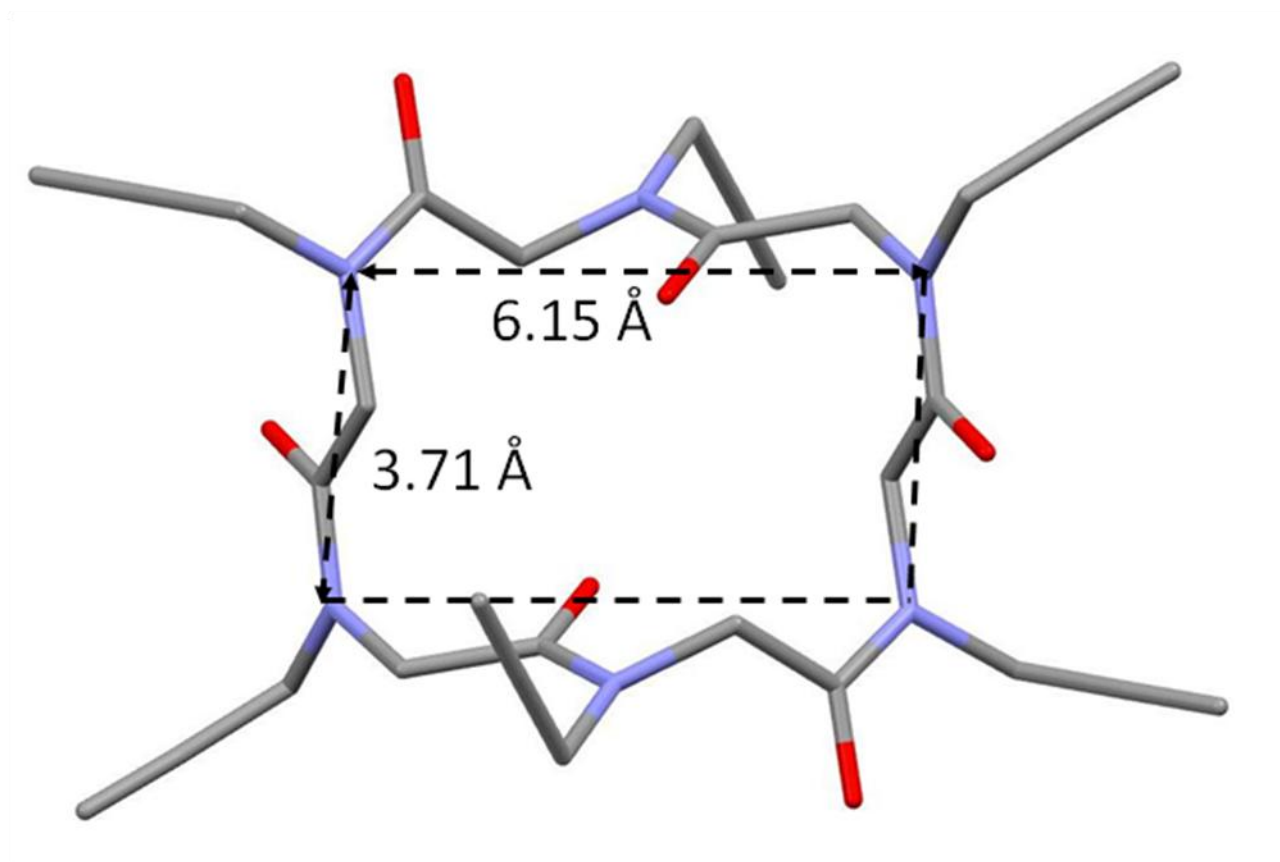

**Figure S3.** Rectangular shape of cyclic peptoid backbone in crystal form **1B**. Four *cis* amide bonds reside at each corner, *trans* amide bonds are located on two opposing sides.

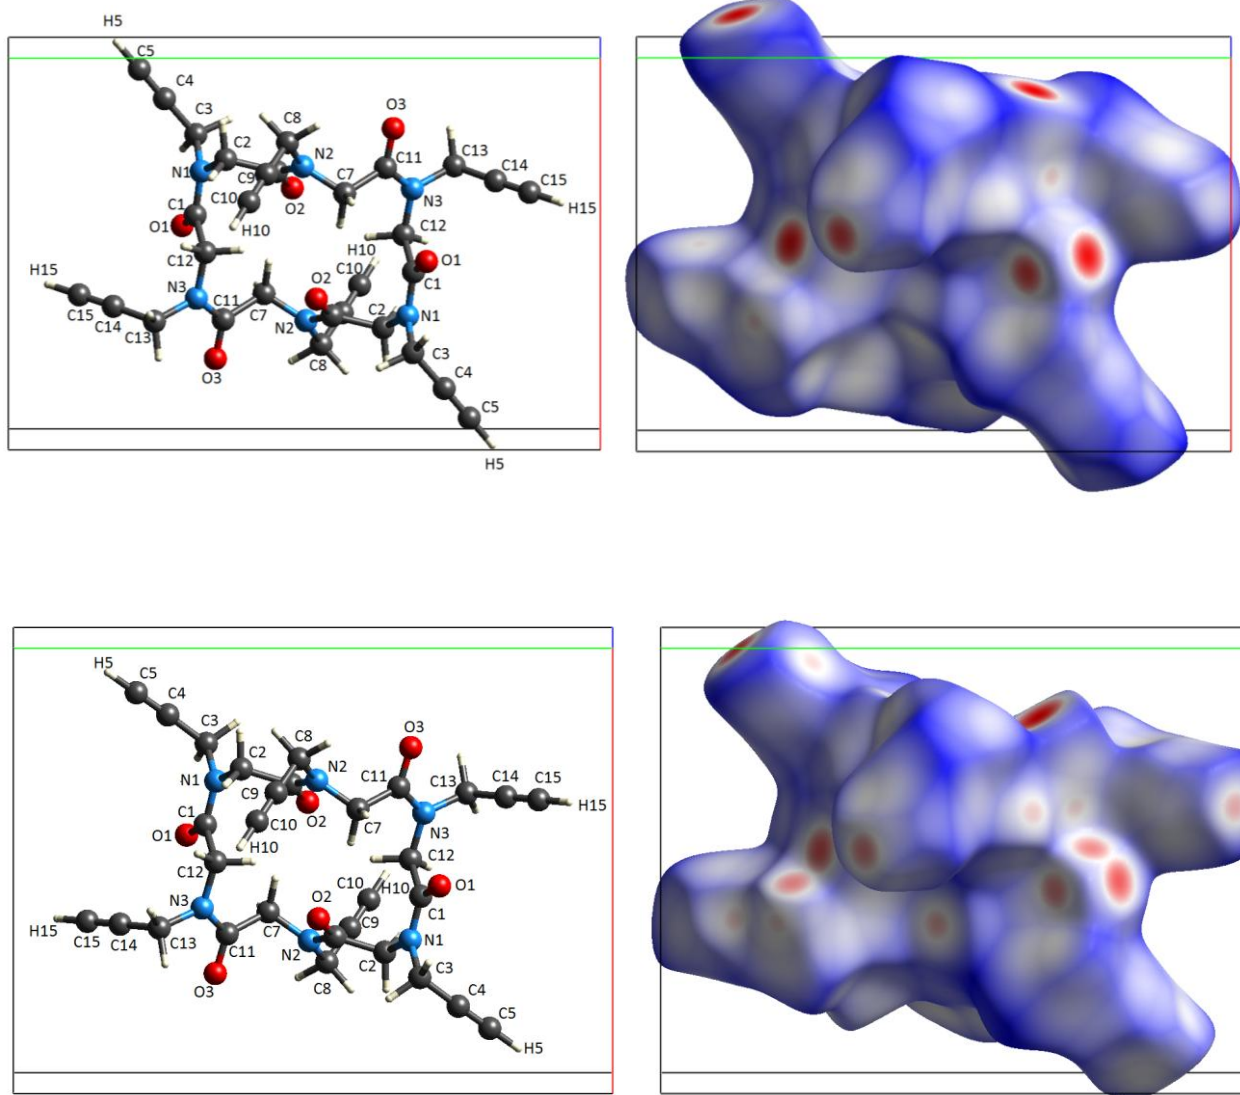

**Figure S4.** Hirshfeld surface for the cyclopeptoid molecule mapped with  $d_{\text{norm}}$  (a) in crystal form **1A** and (b) in crystal form **1B** as viewed along the  $c$  axis.  $a$  and  $b$  cell axes are, respectively, red and green.

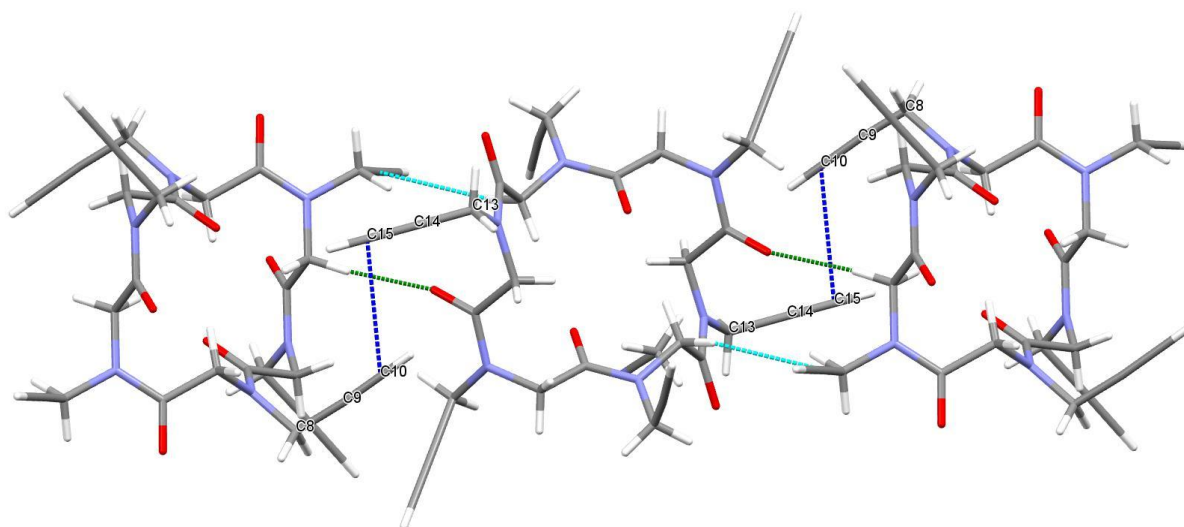

(a)

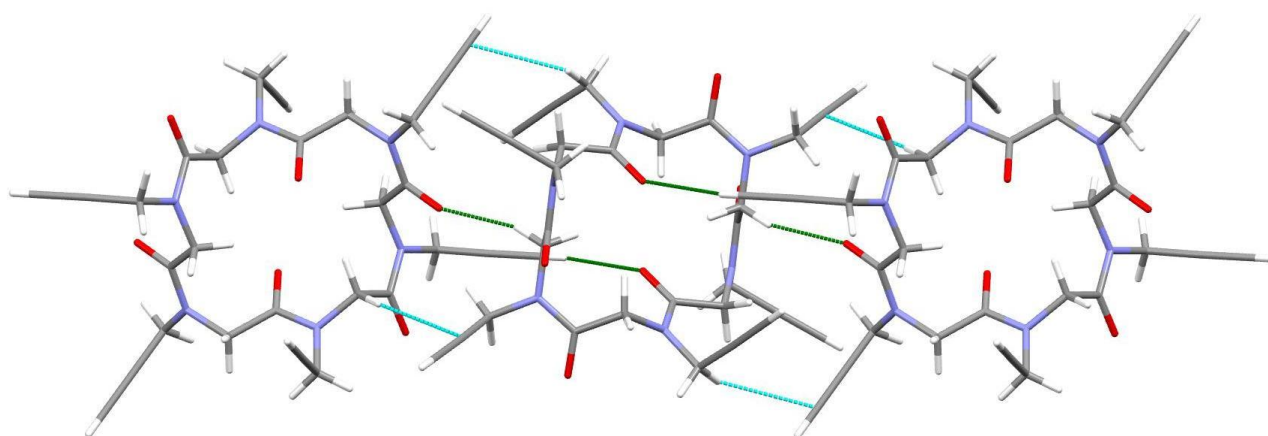

(b)

**Figure S5.** (a) Intralayer CO $\cdots$ HC (green dotted lines), CH- $\pi$  (light blue dotted lines) and  $\pi$ - $\pi$  interactions (blue dotted lines) in **1A**; (b) Intralayer CO $\cdots$ HC (green dotted lines) and CH- $\pi$  interactions (light blue dotted lines) in **1B**.



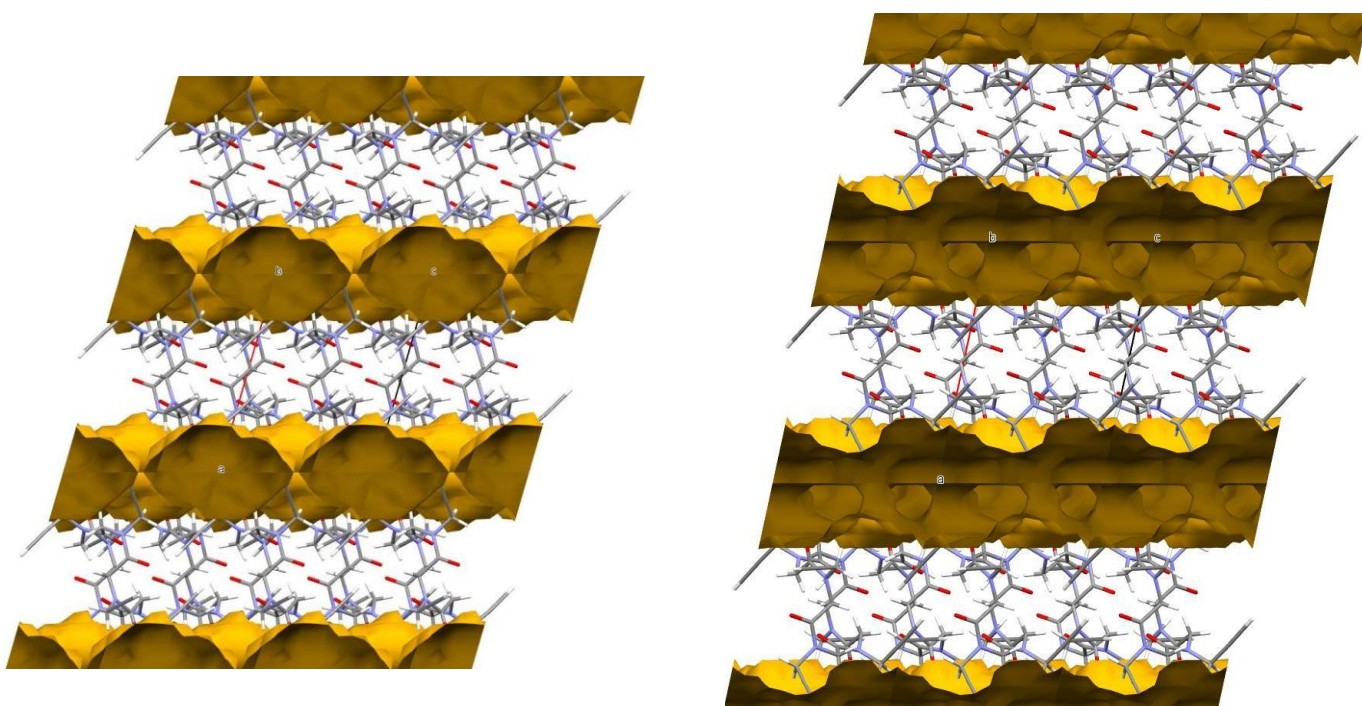

**Figure S6.** Void space available for guest molecules in crystal forms **1A** (left) and **1B** (right) as viewed along the *b* axis.

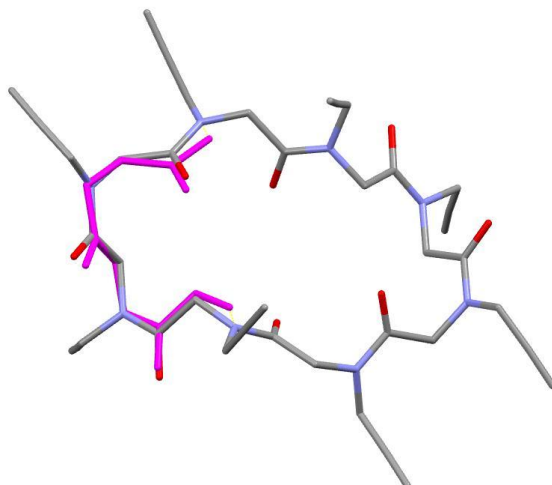

**Figure S7. (a)** Superposition of the backbone atoms of cyclopeptoid molecules in crystal form **2A** with idealized type III *beta*-turn peptide (magenta), rmsd 0.359 Å.

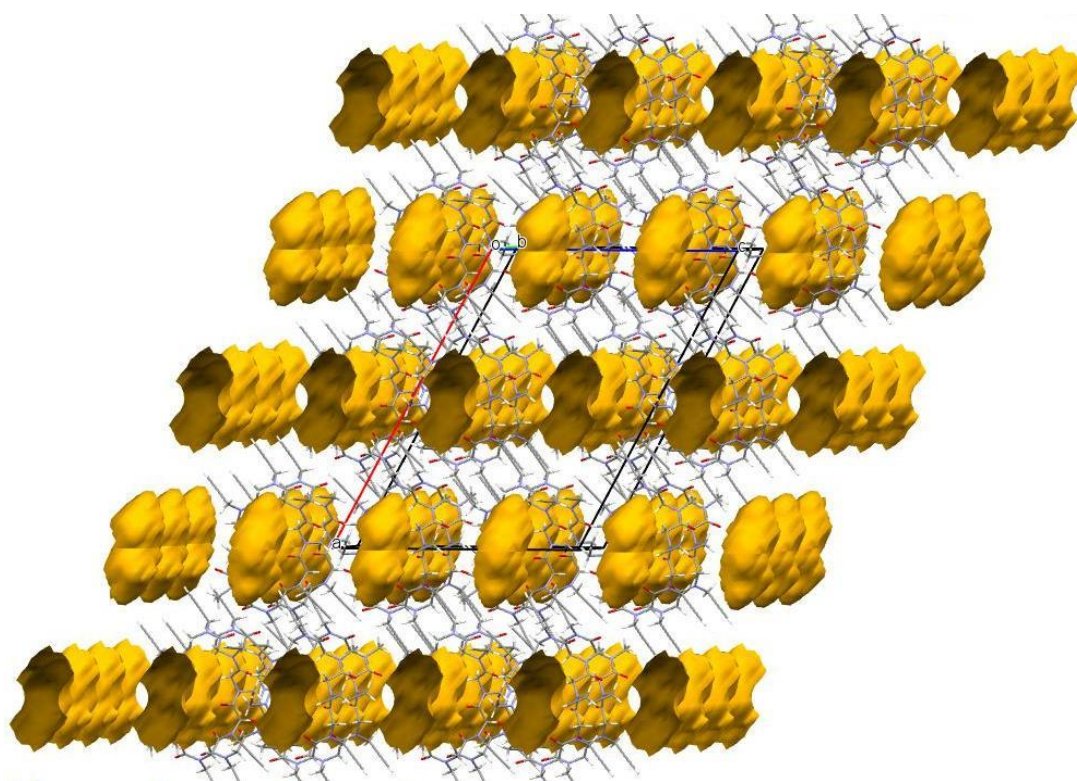

**Figure S8.** Guest accessible voids in crystal form **2A** as viewed along the *b* axis (perspective view).

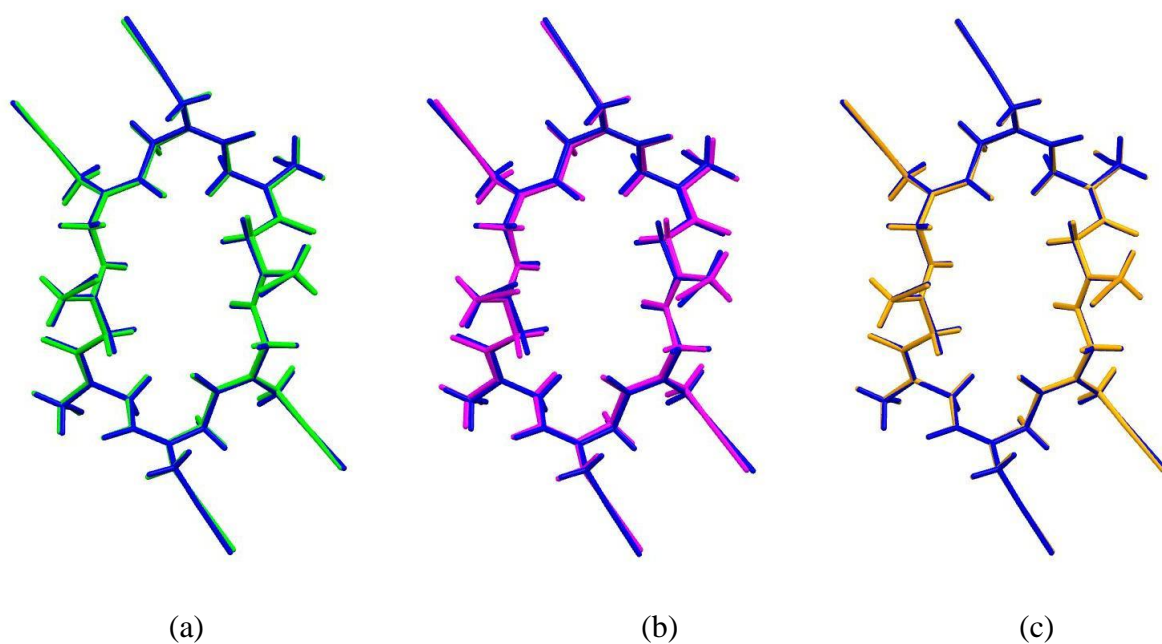

**Figure S9.** (a) Molecular overlay between crystal forms **2A** (blue) and **2B** (green), rmsd 0.1325 Å; (b) molecular overlay between crystal forms **2A** (blue) and **2C** (magenta), rmsd 0.1956 Å; (c) molecular overlay between crystal forms **2A** (blue) and **2D** (orange), rmsd 0.0563 Å.

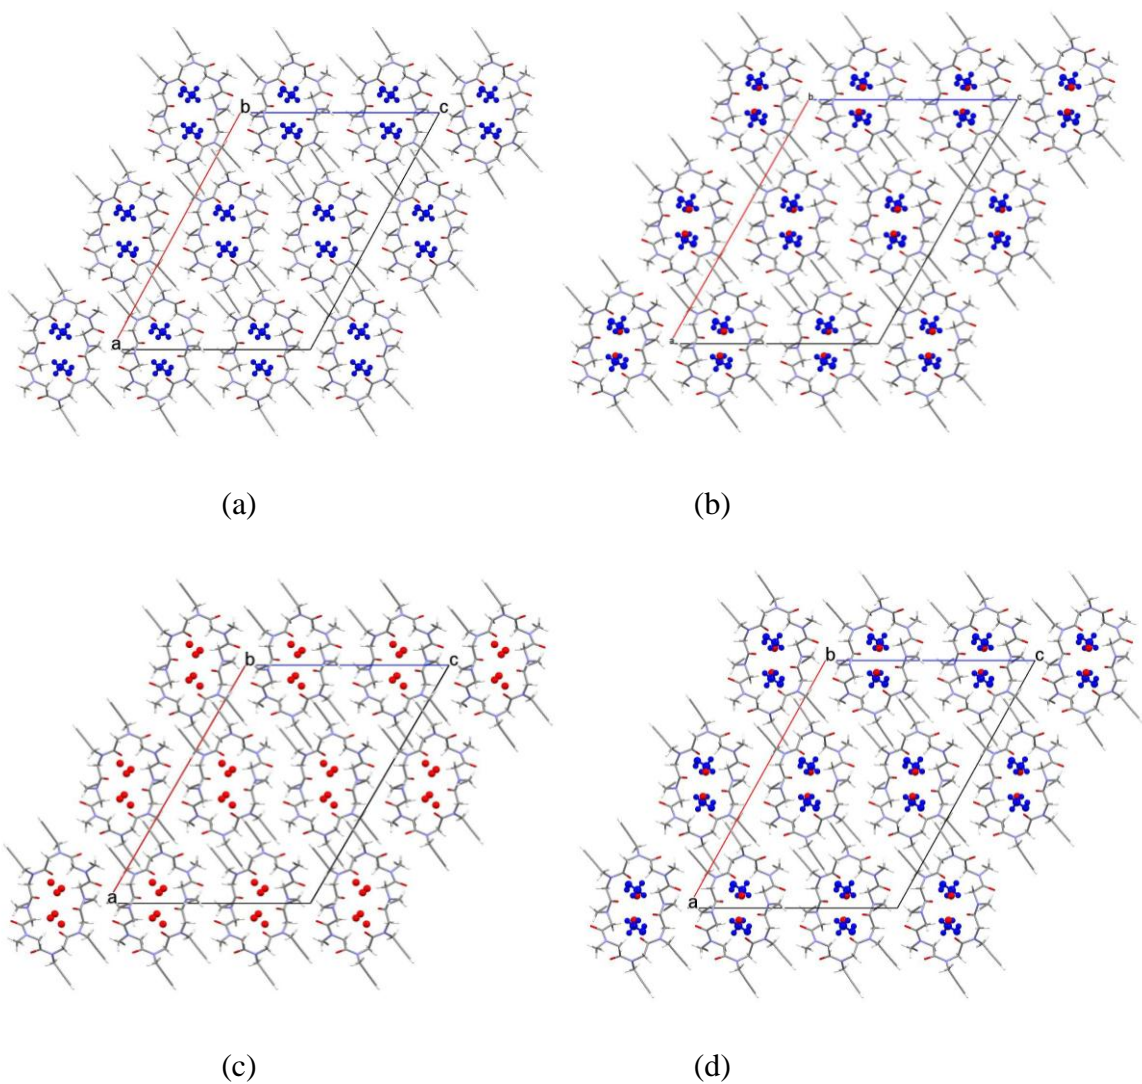

**Figure S10.** Crystal packing of forms **2A** (a), **2B** (b), **2C** (c), and **2D** (d) as viewed along the *b* axis. Guest molecules are depicted as ball-and-sticks, methanol molecules in blue and water molecules in red.
